# Supplementary material for: Quantum chemical and molecular dynamics modelling of hydroxylated polybrominated diphenyl ethers
Source: Royal Society of Chemistry journal article supplement (doi:10.1039/c7cp03471g), 2017-01-01
Supplement: c7cp03471g2.zip [file c7cp03471g2.zip]

Slipids force field for various lipids

Use together with "forcefield.ff" (available at http://people.su.se/~jjm or 
on http://www.gromacs.org/Downloads/User_contributions/Force_fields)
Can be used togther with the AMBER99SB/AMBER99SB-ILDN/AMBER03 FF for proteins

For support/suggestions or whatever: joakim.jambeck@mmk.su.se/joakim.jambeck@gmail.com or lyuba.mmk.su.se

!!!! MAKE SURE YOU CITE THE FOLLOWING REFERENCES WHEN USING THIS FORCE FIELD !!!!

Joakim P. M. Jämbeck and Alexander P. Lyubertsev, "Derivation and Systematic Validation of 
a Refined All-Atom Force Field for Phosphatidylcholine Lipids",
J. Phys. Chem. B, 2012, 116, 3164-3179, DOI: 10.1021/jp212503e

and
 
Joakim P. M. Jämbeck and Alexander P. Lyubertsev, "An Extension and Further Validation of an All-Atomistic Force Field 
for Biological Membranes"
J. Chem. Theory Comput., 8, 2938-2948, DOI: 10.1021/ct300342n

and

Joakim P. M. Jämbeck and Alexander P. Lyubertsev, "Another Piece of the Membrane Puzzle: Extending Slipids Further"
J. Chem. Theory Comput., DOI: 10.1021/ct300777p
